# Supplementary material
Source: MDPI journal article supplement (https://www.mdpi.com/2673-1991/4/2/15)
Supplement: s1 [file s1]

## Supplementary Tables

**Table S1.** Variables of Interest.

| Category                    | Variables of Interest                                                  | Collection Methodology                                                                                                                                  |
|-----------------------------|------------------------------------------------------------------------|---------------------------------------------------------------------------------------------------------------------------------------------------------|
| Patient Demographics        | Age, gender, race/ethnicity, pre-burn comorbidities                    | BMS center staff person and original coder.                                                                                                             |
| Burn Injury Characteristics | Burn size, etiology, location of injury                                | BMS center staff person and original coder.                                                                                                             |
| In-patient Hospitalization  | Length of stay                                                         | BMS center staff person and original coder.                                                                                                             |
| Patient Reported Outcomes   | Anger, sadness, depression, anxiety, fatigue, peer relationships, pain | Patient-Reported Outcomes Measurement Information System (PROMIS) Pediatric and Parent Proxy Profile Instruments, National Institute of Health Toolbox. |

**Table S2.** Intra-Class Correlation Analysis.

|                    | Intra-Class Correlation<br>(Patient vs. Time<br>Point) | Intra-Class Correlation<br>(Site Specific Patients<br>Vs. Time Point) * |
|--------------------|--------------------------------------------------------|-------------------------------------------------------------------------|
| Anger              | 63.15%                                                 | 63.41%                                                                  |
| Sadness            | 61.45%                                                 | 61.45%                                                                  |
| Anxiety            | 12.76%                                                 | 12.77%                                                                  |
| Depression         | 56.59%                                                 | 56.60%                                                                  |
| Fatigue            | 32.75%                                                 | 32.75%                                                                  |
| Peer Relationships | 47.60%                                                 | 47.61%                                                                  |
| Pain Interference  | 57.29%                                                 | 57.30%                                                                  |

\* Intra-Class Correlation of scores at different time points within same patient within specific site.
